# Supplementary material for: Genome-Wide Association Study of Starch Properties in Local Thai Rice
Source: MDPI journal article supplement (doi:10.3390/plants12183290), 2023-09-17
Supplement: s1 [file s1]

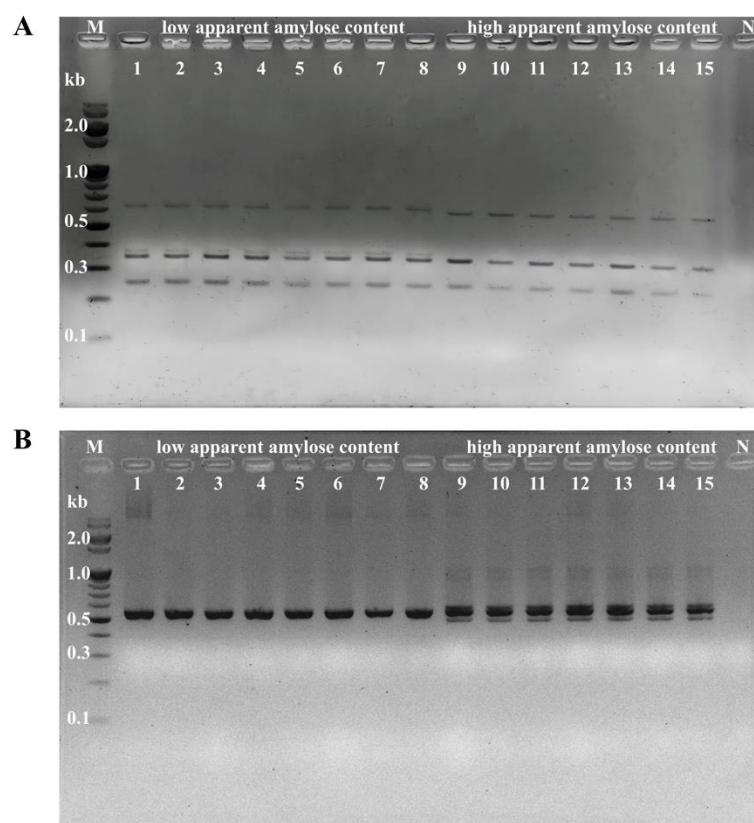

**Figure S1.** Banding pattern of product from Marker I with BpuEI digestion (A); and banding pattern of product from Marker II (B). Lanes 1-8: PCR amplification of rice with low AAC; Lane 9-15: PCR amplification of rice with high AAC; M: 100 bp molecular weight marker and N: negative control.

|    |                     |                                                                   |     |
|----|---------------------|-------------------------------------------------------------------|-----|
|    | reference           | MAILLGDVLAPLP IALNLEYAAAIATPPDPALLGRRYHLRRC AAAARQDDEEEGEQE QEG-  | 59  |
| 1  | KhaoJampi           | MAILLGDVLAPLP IALNLEYAATIAMPDPDALLGRRYHLRRAAARKMMKKKATETMLEK      | 60  |
| 2  | NguangChahng        | MAILLGDVLAPLP IALNLEYAATIAMPDPDALLGRRHHLRRAAARKMMKKKATETMLEK      | 60  |
| 3  | TahKhui             | MAILLGDVLAPLP IALNLEYAATIAMPDPDALLGRRYHLRRAAARKMMKKKATETMLEK      | 60  |
| 4  | KhaoGawDiaw         | MAILLGDVLAPLP IALNLEYAATIAMPDPDALLGRRYHLRRAAARKMMKKKATETMLEK      | 60  |
| 5  | HawmSurin           | MAILLGDVLAPLP IALNLEYTATIAMPDPDALLGRRHHLRRAAARKMMKKKATETMLEK      | 60  |
| 6  | JekChuey            | MAILLGDVLAPLP IALNLEYTAAIATPPDPALLGRRYHLRRC AAAARQDDEEEGEQE QEG-  | 59  |
| 7  | LaiMaejo            | MAILLGDVLAPLP IALNLEYTAAIATPPDPALLGRRYHLRRC AAAARQDDEEEGEQE QEG-  | 59  |
| 8  | NiawKhiawNgoo       | MAILLGDVLAPLP IALNLEYTAAIATPPDPALLGRRYHLRRC AAAARQDDEEEGEQE QEG-  | 59  |
| 9  | NiawDamHawmPooKhiaw | MAILLGDVLAPLP IALNLEYAAAIATPPDPALLGRRYHLRRC AAAARQDDEEEGEQE QEG-  | 59  |
| 10 | LawdGwian           | MAILLGDVLAPLP IALNLEYTAAIATPPDPALLGRRYHLRRC AAAARQDDEEEGEQE QEG-  | 59  |
|    | reference           | -HG--NYVGKSTPKVPQLV NELQNRPLTAKPDIQRPLTNQNR SQMVL PWFSPRFC PMWRL  | 116 |
| 1  | KhaoJampi           | VHRRSLNLSTSYKIVP*-----                                            | 76  |
| 2  | NguangChahng        | VHRRSLNLSSSYKIVPQPQNQISNVP*-----                                  | 86  |
| 3  | TahKhui             | VHRRSLNLSSSYKIVPQPQNQISNVP*-----                                  | 86  |
| 4  | KhaoGawDiaw         | VHRRSLNLSTSYKIVP*-----                                            | 76  |
| 5  | HawmSurin           | VHRRSLNLSSSYKIVPQPQNQISNVP*-----                                  | 86  |
| 6  | JekChuey            | -HG--NYVRKSTSKVPQLV IELQNRPP TAKPDIQRPLTNQNR SQMVL PWFSPRFC PM*-- | 113 |
| 7  | LaiMaejo            | -HG--NYVRKSTSKVPQLV IELQNRPP TAKPDIQRPLTNQNR SQMVPV PWF*-----     | 106 |
| 8  | NiawKhiawNgoo       | -HG--NYVRKSTSKVPQLV IELQNRPP TAKPDIQRPLTNQNR SQMVPV PWF*-----     | 106 |
| 9  | NiawDamHawmPooKhiaw | -HG--NYVRKSTSKVPQLV NELQNRPLTAKPDIQRPLTNQNR SQMVL PWFSPRFC PM*--  | 113 |
| 10 | LawdGwian           | -HG--NYVRKSTSKVPQLV IELQNRPP TAKPDIQRPLTNQNR SQMVPV PWF*-----     | 106 |
|    | reference           | SQRGTHVDSIYQAATSTLNTMISTAITRCGRYLQRRSRH NAPS YLRSSSATRTISLSSA     | 176 |
| 1  | KhaoJampi           | -----                                                             | 76  |
| 2  | NguangChahng        | -----                                                             | 86  |
| 3  | TahKhui             | -----                                                             | 86  |
| 4  | KhaoGawDiaw         | -----                                                             | 76  |
| 5  | HawmSurin           | -----                                                             | 86  |
| 6  | JekChuey            | -----                                                             | 113 |
| 7  | LaiMaejo            | -----                                                             | 106 |
| 8  | NiawKhiawNgoo       | -----                                                             | 106 |
| 9  | NiawDamHawmPooKhiaw | -----                                                             | 113 |
| 10 | LawdGwian           | -----                                                             | 106 |
|    | reference           | STSAVAAPALMRHKSRSASLSLPRSVKLLGVSGMDAAP TMTMTAETMSAPSESGSGGET      | 236 |
| 1  | KhaoJampi           | -----                                                             | 76  |
| 2  | NguangChahng        | -----                                                             | 86  |
| 3  | TahKhui             | -----                                                             | 86  |
| 4  | KhaoGawDiaw         | -----                                                             | 76  |
| 5  | HawmSurin           | -----                                                             | 86  |
| 6  | JekChuey            | -----                                                             | 113 |
| 7  | LaiMaejo            | -----                                                             | 106 |
| 8  | NiawKhiawNgoo       | -----                                                             | 106 |
| 9  | NiawDamHawmPooKhiaw | -----                                                             | 113 |
| 10 | LawdGwian           | -----                                                             | 106 |
|    | reference           | TTTTLLGFGVG DGSQRRRCSA*                                           | 257 |
| 1  | KhaoJampi           | -----                                                             | 76  |
| 2  | NguangChahng        | -----                                                             | 86  |
| 3  | TahKhui             | -----                                                             | 86  |
| 4  | KhaoGawDiaw         | -----                                                             | 76  |
| 5  | HawmSurin           | -----                                                             | 86  |
| 6  | JekChuey            | -----                                                             | 113 |
| 7  | LaiMaejo            | -----                                                             | 106 |
| 8  | NiawKhiawNgoo       | -----                                                             | 106 |
| 9  | NiawDamHawmPooKhiaw | -----                                                             | 113 |
| 10 | LawdGwian           | -----                                                             | 106 |

**Figure S2.** Sequence alignment of LOC\_Os01g65810 in 10 rice cultivars with 5 high AAC (row 1-5) and 5 low ACC (row 6-10); *Nipponbare* rice was used as a reference genome sequence.

|    | reference           | MSALTTSQLATSATGFGIADRSAPSSLLRHGFQGLKPRSPAGGDATSLSVTTTSARATPKQ | 60 |
|----|---------------------|---------------------------------------------------------------|----|
| 1  | KhaoJampi           | MSALTTSQLATSATGFGIADRSAPSSLLRHGFQGLKPRSPAGGDATSLSVTTTSARATPKQ | 60 |
| 2  | NguangChahng        | MSALTTSQLATSATGFGIADRSAPSSLLRHGFQGLKPRSPAGGDATSLSVTTTSARATPKQ | 60 |
| 3  | TahKhui             | MSALTTSQLATSATGFGIADRSAPSSLLRHGFQGLKPRSPAGGDATSLSVTTTSARATPKQ | 60 |
| 4  | KhaoGawDiaw         | MSALTTSQLATSATGFGIADRSAPSSLLRHGFQGLKPRSPAGGDATSLSVTTTSARATPKQ | 60 |
| 5  | HawmSurin           | MSALTTSQLATSATGFGIADRSAPSSLLRHGFQGLKPRSPAGGDATSLSVTTTSARATPKQ | 60 |
| 6  | JekChuey            | MSALTTSQLATSATGFGIADRSAPSSLLRHGFQGLKPTGSRASSPAAPPAATRRRSA*--  | 57 |
| 7  | LaiMaejo            | MSALTTSQLATSATGFGIADRSAPSSLLRHGFQGLKPTGSRASSPAAPPAATRRRSA*--  | 57 |
| 8  | NiawKhiawNgoo       | MSALTTSQLATSATGFGIADRSAPSSLLRHGFQGLKPTGSRASSPAAPPAATRRRSA*--  | 57 |
| 9  | NiawDamHawmPooKhiaw | MSALTTSQLATSATGFGIADRSAPSSLLRHGFQGLKPTGSRASSPAAPPAATRRRSA*--  | 57 |
| 10 | LawdGwian           | MSALTTSQLATSATGFGIADRSAPSSLLRHGFQGLKPTGSRASSPAAPPAATRRRSA*--  | 57 |

|    | reference           | QRSVQSGSRRFSPVVVYATGAGMNVVFGAEMAPWSKTGGLGDVLGGLPPAMAANGHRVM | 120 |
|----|---------------------|-------------------------------------------------------------|-----|
| 1  | KhaoJampi           | QRSVQSGSRRFSPVVVYATGAGMNVVFGAEMAPWSKTGGLGDVLGGLPPAMAANGHRVM | 120 |
| 2  | NguangChahng        | QRSVQSGSRRFSPVVVYATGAGMNVVFGAEMAPWSKTGGLGDVLGGLPPAMAANGHRVM | 120 |
| 3  | TahKhui             | QRSVQSGSRRFSPVVVYATGAGMNVVFGAEMAPWSKTGGLGDVLGGLPPAMAANGHRVM | 120 |
| 4  | KhaoGawDiaw         | QRSVQSGSRRFSPVVVYATGAGMNVVFGAEMAPWSKTGGLGDVLGGLPPAMAANGHRVM | 120 |
| 5  | HawmSurin           | QRSVQSGSRRFSPVVVYATGAGMNVVFGAEMAPWSKTGGLGDVLGGLPPAMAANGHRVM | 120 |
| 6  | JekChuey            | -----                                                       | 57  |
| 7  | LaiMaejo            | -----                                                       | 57  |
| 8  | NiawKhiawNgoo       | -----                                                       | 57  |
| 9  | NiawDamHawmPooKhiaw | -----                                                       | 57  |
| 10 | LawdGwian           | -----                                                       | 57  |

|    | reference           | VISPRYDQYKDAWDTSVVAEIKVADRYERVRFFHCYKRGVDRVFDHPSFLEKVVWGKTGE | 180 |
|----|---------------------|--------------------------------------------------------------|-----|
| 1  | KhaoJampi           | VISPRYDQYKDAWDTSVVAEIKVADRYERVRFFHCYKRGVDRVFDHPSFLEKVVWGKTGE | 180 |
| 2  | NguangChahng        | VISPRYDQYKDAWDTSVVAEIKVADRYERVRFFHCYKRGVDRVFDHPSFLEKVVWGKTGE | 180 |
| 3  | TahKhui             | VISPRYDQYKDAWDTSVVAEIKVADRYERVRFFHCYKRGVDRVFDHPSFLEKVVWGKTGE | 180 |
| 4  | KhaoGawDiaw         | VISPRYDQYKDAWDTSVVAEIKVADRYERVRFFHCYKRGVDRVFDHPSFLEKVVWGKTGE | 180 |
| 5  | HawmSurin           | VISPRYDQYKDAWDTSVVAEIKVADRYERVRFFHCYKRGVDRVFDHPSFLEKVVWGKTGE | 180 |
| 6  | JekChuey            | -----                                                        | 57  |
| 7  | LaiMaejo            | -----                                                        | 57  |
| 8  | NiawKhiawNgoo       | -----                                                        | 57  |
| 9  | NiawDamHawmPooKhiaw | -----                                                        | 57  |
| 10 | LawdGwian           | -----                                                        | 57  |

|    | reference           | KIYGPDVGVDYKDNQMRFSLLCQAALAPRILNLNNNPYFKGTYGEDVVFVNCNDWHTGPL | 240 |
|----|---------------------|--------------------------------------------------------------|-----|
| 1  | KhaoJampi           | KIYGPDVGVDYKDNQMRFSLLCQAALAPRILNLNNNPYFKGTYGEDVVFVNCNDWHTGPL | 240 |
| 2  | NguangChahng        | KIYGPDVGVDYKDNQMRFSLLCQAALAPRILNLNNNPYFKGTYGEDVVFVNCNDWHTGPL | 240 |
| 3  | TahKhui             | KIYGPDVGVDYKDNQMRFSLLCQAALAPRILNLNNNPYFKGTYGEDVVFVNCNDWHTGPL | 240 |
| 4  | KhaoGawDiaw         | KIYGPDVGVDYKDNQMRFSLLCQAALAPRILNLNNNPYFKGTYGEDVVFVNCNDWHTGPL | 240 |
| 5  | HawmSurin           | KIYGPDVGVDYKDNQMRFSLLCQAALAPRILNLNNNPYFKGTYGEDVVFVNCNDWHTGPL | 240 |
| 6  | JekChuey            | -----                                                        | 57  |
| 7  | LaiMaejo            | -----                                                        | 57  |
| 8  | NiawKhiawNgoo       | -----                                                        | 57  |
| 9  | NiawDamHawmPooKhiaw | -----                                                        | 57  |
| 10 | LawdGwian           | -----                                                        | 57  |

|    | reference           | ASYLKNNYQPNGIYRNAKVAFCIHNNISYQGRFAFEDYPELNLSEFRSSSDFIDGYDTPV | 300 |
|----|---------------------|--------------------------------------------------------------|-----|
| 1  | KhaoJampi           | ASYLKNNYQPNGIYRNAKVAFCIHNNISYQGRFAFEDYPELNLSEFRSSSDFIDGYDTPV | 300 |
| 2  | NguangChahng        | ASYLKNNYQPNGIYRNAKVAFCIHNNISYQGRFAFEDYPELNLSEFRSSSDFIDGYDTPV | 300 |
| 3  | TahKhui             | ASYLKNNYQPNGIYRNAKVAFCIHNNISYQGRFAFEDYPELNLSEFRSSSDFIDGYDTPV | 300 |
| 4  | KhaoGawDiaw         | ASYLKNNYQPNGIYRNAKVAFCIHNNISYQGRFAFEDYPELNLSEFRSSSDFIDGYDTPV | 300 |
| 5  | HawmSurin           | ASYLKNNYQPNGIYRNAKVAFCIHNNISYQGRFAFEDYPELNLSEFRSSSDFIDGYDTPV | 300 |
| 6  | JekChuey            | -----                                                        | 57  |
| 7  | LaiMaejo            | -----                                                        | 57  |
| 8  | NiawKhiawNgoo       | -----                                                        | 57  |
| 9  | NiawDamHawmPooKhiaw | -----                                                        | 57  |
| 10 | LawdGwian           | -----                                                        | 57  |

|    | reference           | EGRKINWMKAGILEADRVLTVPYYAEELISGIARGCELDNIMRLTGITGIVNGMDVSEW | 360 |
|----|---------------------|-------------------------------------------------------------|-----|
| 1  | KhaoJampi           | EGRKINWMKAGILEADRVLTVPYYAEELISGIARGCELDNIMRLTGITGIVNGMDVSEW | 360 |
| 2  | NguangChahng        | EGRKINWMKAGILEADRVLTVPYYAEELISGIARGCELDNIMRLTGITGIVNGMDVSEW | 360 |
| 3  | TahKhui             | EGRKINWMKAGILEADRVLTVPYYAEELISGIARGCELDNIMRLTGITGIVNGMDVSEW | 360 |
| 4  | KhaoGawDiaw         | EGRKINWMKAGILEADRVLTVPYYAEELISGIARGCELDNIMRLTGITGIVNGMDVSEW | 360 |
| 5  | HawmSurin           | EGRKINWMKAGILEADRVLTVPYYAEELISGIARGCELDNIMRLTGITGIVNGMDVSEW | 360 |
| 6  | JekChuey            | -----                                                       | 57  |
| 7  | LaiMaejo            | -----                                                       | 57  |
| 8  | NiawKhiawNgoo       | -----                                                       | 57  |
| 9  | NiawDamHawmPooKhiaw | -----                                                       | 57  |
| 10 | LawdGwian           | -----                                                       | 57  |

| reference             | DPSKDKYITAKYDATTAEAKALNKEALQAEAGLPVDRKIPLIAFIGRLEEQKGPDMVMAA | 420 |
|-----------------------|--------------------------------------------------------------|-----|
| 1 KhaoJampi           | DPSKDKYITAKYDATTAEAKALNKEALQAEAGLPVDRKIPLIAFIGRLEEQKGSVMMAA  | 420 |
| 2 NguangChahng        | DPSKDKYITAKYDATTAEAKALNKEALQAEAGLPVDRKIPLIAFIGRLEEQKGSVMMAA  | 420 |
| 3 TahKhui             | DPSKDKYITAKYDATTAEAKALNKEALQAEAGLPVDRKIPLIAFIGRLEEQKGSVMMAA  | 420 |
| 4 KhaoGawDiaw         | DPSKDKYITAKYDATTAEAKALNKEALQAEAGLPVDRKIPLIAFIGRLEEQKGSVMMAA  | 420 |
| 5 HawmSurin           | DPSKDKYITAKYDATTAEAKALNKEALQAEAGLPVDRKIPLIAFIGRLEEQKGSVMMAA  | 420 |
| 6 JekChuey            | -----                                                        | 57  |
| 7 LaiMaejo            | -----                                                        | 57  |
| 8 NiawKhiawNgoo       | -----                                                        | 57  |
| 9 NiawDamHawmPooKhiaw | -----                                                        | 57  |
| 10 LawdGwian          | -----                                                        | 57  |
| reference             | AIPELMQEDVQIVLLGTGKKKFEKLLKSMEEEKYPGKVRVVKFNAPLAHLIMAGADVLAV | 480 |
| 1 KhaoJampi           | AIPELMQEDVQIVLLGTGKKKFEKLLKSMEEEKYPGKVRVVKFNAPLAHLIMAGADVLAV | 480 |
| 2 NguangChahng        | AIPELMQEDVQIVLLGTGKKKFEKLLKSMEEEKYPGKVRVVKFNAPLAHLIMAGADVLAV | 480 |
| 3 TahKhui             | AIPELMQEDVQIVLLGTGKKKFEKLLKSMEEEKYPGKVRVVKFNAPLAHLIMAGADVLAV | 480 |
| 4 KhaoGawDiaw         | AIPELMQEDVQIVLLGTGKKKFEKLLKSMEEEKYPGKVRVVKFNAPLAHLIMAGADVLAV | 480 |
| 5 HawmSurin           | AIPELMQEDVQIVLLGTGKKKFEKLLKSMEEEKYPGKVRVVKFNAPLAHLIMAGADVLAV | 480 |
| 6 JekChuey            | -----                                                        | 57  |
| 7 LaiMaejo            | -----                                                        | 57  |
| 8 NiawKhiawNgoo       | -----                                                        | 57  |
| 9 NiawDamHawmPooKhiaw | -----                                                        | 57  |
| 10 LawdGwian          | -----                                                        | 57  |
| reference             | PSRFEPGLIQLQGMRYGTPCACASTGGLVDTVIEGKTGFHMGRLSVDCCKVVEPSDVKKV | 540 |
| 1 KhaoJampi           | PSRFEPGLIQLQGMRYGTPCACASTGGLVDTVIEGKTGFHMGRLSVDCCKVVEPSDVKKV | 540 |
| 2 NguangChahng        | PSRFEPGLIQLQGMRYGTPCACASTGGLVDTVIEGKTGFHMGRLSVDCCKVVEPSDVKKV | 540 |
| 3 TahKhui             | PSRFEPGLIQLQGMRYGTPCACASTGGLVDTVIEGKTGFHMGRLSVDCCKVVEPSDVKKV | 540 |
| 4 KhaoGawDiaw         | PSRFEPGLIQLQGMRYGTPCACASTGGLVDTVIEGKTGFHMGRLSVDCCKVVEPSDVKKV | 540 |
| 5 HawmSurin           | PSRFEPGLIQLQGMRYGTPCACASTGGLVDTVIEGKTGFHMGRLSVDCCKVVEPSDVKKV | 540 |
| 6 JekChuey            | -----                                                        | 57  |
| 7 LaiMaejo            | -----                                                        | 57  |
| 8 NiawKhiawNgoo       | -----                                                        | 57  |
| 9 NiawDamHawmPooKhiaw | -----                                                        | 57  |
| 10 LawdGwian          | -----                                                        | 57  |
| reference             | AATLKRAIKVVGTPAYEEMVRNCMNQDLQSWKGPKNWENVLLGLGVAGSAPGIEGDEIAP | 600 |
| 1 KhaoJampi           | AATLKRAIKVVGTPAYEEMVRNCMNQDLQSWKGPKNWENVLLGLGVAGSAPGIEGDEIAP | 600 |
| 2 NguangChahng        | AATLKRAIKVVGTPAYEEMVRNCMNQDLQSWKGPKNWENVLLGLGVAGSAPGIEGDEIAP | 600 |
| 3 TahKhui             | AATLKRAIKVVGTPAYEEMVRNCMNQDLQSWKGPKNWENVLLGLGVAGSAPGIEGDEIAP | 600 |
| 4 KhaoGawDiaw         | AATLKRAIKVVGTPAYEEMVRNCMNQDLQSWKGPKNWENVLLGLGVAGSAPGIEGDEIAP | 600 |
| 5 HawmSurin           | AATLKRAIKVVGTPAYEEMVRNCMNQDLQSWKGPKNWENVLLGLGVAGSAPGIEGDEIAP | 600 |
| 6 JekChuey            | -----                                                        | 57  |
| 7 LaiMaejo            | -----                                                        | 57  |
| 8 NiawKhiawNgoo       | -----                                                        | 57  |
| 9 NiawDamHawmPooKhiaw | -----                                                        | 57  |
| 10 LawdGwian          | -----                                                        | 57  |
| reference             | LAKENVAAP*                                                   | 609 |
| 1 KhaoJampi           | LAKENVAAP*                                                   | 609 |
| 2 NguangChahng        | LAKENVAAP*                                                   | 609 |
| 3 TahKhui             | LAKENVAAP*                                                   | 609 |
| 4 KhaoGawDiaw         | LAKENVAAP*                                                   | 609 |
| 5 HawmSurin           | LAKENVAAP*                                                   | 609 |
| 6 JekChuey            | -----                                                        | 57  |
| 7 LaiMaejo            | -----                                                        | 57  |
| 8 NiawKhiawNgoo       | -----                                                        | 57  |
| 9 NiawDamHawmPooKhiaw | -----                                                        | 57  |
| 10 LawdGwian          | -----                                                        | 57  |

**Figure S3** Sequence alignment of LOC\_Os06g04200 in 10 rice cultivars with high AAC (row 1-5) and low ACC (row 6-10); *Nipponbare* rice was used as a reference genome sequence.
